# Supplementary material for: Circulating Tumor DNA Analysis: Clinical Implications for Colorectal Cancer Patients. A Systematic Review
Source: PubMed Central journal article supplement (PMC7050033; doi:10.1093/jncics/pkz042), 2019-06-19
Supplement: pkz042_supplementary_data.pdf [file pkz042_supplementary_data.pdf]

**Supplementary Table 1**

**Search strategy for PubMed (3 December 2018)**

[Mesh] = Medical subject headings

[tiab] = words in title OR abstract

| Search | Query                                                                                                                                                                                                                                                                                                                                                                                                                                                                                                                                                                                                                                                                                                                                                                                                                                                                                                                                                             | Items found |
|--------|-------------------------------------------------------------------------------------------------------------------------------------------------------------------------------------------------------------------------------------------------------------------------------------------------------------------------------------------------------------------------------------------------------------------------------------------------------------------------------------------------------------------------------------------------------------------------------------------------------------------------------------------------------------------------------------------------------------------------------------------------------------------------------------------------------------------------------------------------------------------------------------------------------------------------------------------------------------------|-------------|
| #5     | #4 NOT (animals[mh] NOT humans[mh])                                                                                                                                                                                                                                                                                                                                                                                                                                                                                                                                                                                                                                                                                                                                                                                                                                                                                                                               | 2,194       |
| #4     | #1 AND #2 AND #3                                                                                                                                                                                                                                                                                                                                                                                                                                                                                                                                                                                                                                                                                                                                                                                                                                                                                                                                                  | 2,393       |
| #3     | "Blood"[Mesh] OR "blood" [Subheading] OR plasma*[tiab] OR "Hematologic Tests"[Mesh] OR hematolog*[tiab] OR haematolog*[tiab] OR blood[tiab] OR serum*[tiab] OR seral*[tiab]                                                                                                                                                                                                                                                                                                                                                                                                                                                                                                                                                                                                                                                                                                                                                                                       | 4,431,122   |
| #2     | "DNA Methylation"[Mesh] OR "DNA Copy Number Variations"[Mesh] OR (("DNA"[Mesh] OR dna[tiab] OR dnas[tiab] OR kras[tiab] OR braf[tiab] OR sept9[tiab] OR "sept 9"[tiab] OR cdkn2a[tiab] OR p16[tiab] OR hltf[tiab] OR alx4[tiab] OR alex4[tiab] OR bcat1[tiab] OR ikzf1[tiab] OR vim[tiab] OR pik3ca[tiab] OR tp53[tiab] OR "tp 53"[tiab] OR apc[tiab] OR cfdna*[tiab] OR ccdna*[tiab] OR ctdna*[tiab] OR ftdna*[tiab] OR fcdna*[tiab] OR cpdna*[tiab]) AND ("Methylation"[Mesh] OR "Mutation"[Mesh] OR methylati*[tiab] OR mutation*[tiab] OR (copy number*[tiab] AND (variation*[tiab] OR variant*[tiab] OR change*[tiab])) OR abberati*[tiab] OR alterati*[tiab] OR amplificati*[tiab] OR gain*[tiab] OR loss*[tiab] OR deleti*[tiab]))                                                                                                                                                                                                                         | 451,201     |
| #1     | "Colorectal Neoplasms"[Mesh] OR "Appendiceal Neoplasms"[Mesh] OR ((carcinoma*[tiab] OR neoplas*[tiab] OR tumour*[tiab] OR adenocar*[tiab] OR adenoid*[tiab] OR tumor[tiab] OR tumora*[tiab] OR tumorb*[tiab] OR tumorc*[tiab] OR tumord*[tiab] OR tumore*[tiab] OR tumorf*[tiab] OR tumorg*[tiab] OR tumorh*[tiab] OR tumori*[tiab] OR tumorj*[tiab] OR tumork*[tiab] OR tumorl*[tiab] OR tumorm*[tiab] OR tumorn*[tiab] OR tumoro*[tiab] OR tumorp*[tiab] OR tumorq*[tiab] OR tumorr*[tiab] OR tumors*[tiab] OR tumort*[tiab] OR tumoru*[tiab] OR tumorv*[tiab] OR tumorw*[tiab] OR tumorx*[tiab] OR tumory*[tiab] OR tumorz*[tiab] OR cancer*[tiab] OR malignan*[tiab]) AND ("Intestine, Large"[Mesh:NoExp] OR "Cecum"[Mesh] OR "Colon"[Mesh] OR "Rectum"[Mesh] OR colorectal*[tiab] OR colon*[tiab] OR rectal*[tiab] OR appendi*[tiab] OR cecum*[tiab] OR coecum*[tiab] OR caecum*[tiab] OR cecal*[tiab] OR coecal*[tiab] OR caecal*[tiab] OR sigmoid*[tiab])) | 323,289     |

**Search strategy for Embase.com (3 December 2018)**

/exp = EMtree keyword with explosion

/de = EMtree keyword without explosion

/mj = EMtree keyword as major subject

:ti,ab = words in title or abstract

| Search | Query | Items found |
|--------|-------|-------------|
|--------|-------|-------------|

|    |                                                                                                                                                                                                                                                                                                                                                                                                                                                                                                                                                                                                                                                                                                                                                                                                                                                   |           |
|----|---------------------------------------------------------------------------------------------------------------------------------------------------------------------------------------------------------------------------------------------------------------------------------------------------------------------------------------------------------------------------------------------------------------------------------------------------------------------------------------------------------------------------------------------------------------------------------------------------------------------------------------------------------------------------------------------------------------------------------------------------------------------------------------------------------------------------------------------------|-----------|
| #5 | #4 NOT ('animal cell'/de OR 'animal experiment'/de OR 'animal model'/de OR 'animal tissue'/de OR 'cancer cell culture'/de OR 'case report'/de OR 'human cell'/de OR 'in vitro study'/de OR 'nonhuman'/de)                                                                                                                                                                                                                                                                                                                                                                                                                                                                                                                                                                                                                                         | 3,221     |
| #4 | #1 AND #2 AND #3                                                                                                                                                                                                                                                                                                                                                                                                                                                                                                                                                                                                                                                                                                                                                                                                                                  | 5,462     |
| #3 | 'blood'/exp OR 'blood examination'/exp OR plasma*:ab,ti,kw OR hematolog*:ab,ti,kw OR haematolog*:ab,ti,kw OR blood:ab,ti,kw OR serum*:ab,ti,kw OR seral*:ab,ti,kw                                                                                                                                                                                                                                                                                                                                                                                                                                                                                                                                                                                                                                                                                 | 5,379,508 |
| #2 | 'dna methylation'/exp OR 'dna methylation assay'/exp OR 'copy number variation'/exp OR (('dna'/exp OR dna:ti,ab,kw OR dnas:ti,ab,kw OR kras:ti,ab,kw OR braf:ti,ab,kw OR sept9:ti,ab,kw OR 'sept 9':ti,ab,kw OR cdkn2a:ti,ab,kw OR p16:ti,ab,kw OR hltf:ti,ab,kw OR alx4:ti,ab,kw OR alex4:ti,ab,kw OR bcat1:ti,ab,kw OR ikzf1:ti,ab,kw OR vim:ti,ab,kw OR pik3ca:ti,ab,kw OR tp53:ti,ab,kw OR 'tp 53':ti,ab,kw OR apc:ti,ab,kw OR cfdna*:ti,ab,kw OR ccdna*:ti,ab,kw OR ctdna*:ti,ab,kw OR ftdna*:ti,ab,kw OR fcdna*:ti,ab,kw OR cpdna*:ti,ab,kw) AND ('mutation'/exp OR 'methylation'/exp OR methylati*:ti,ab,kw OR mutation*:ti,ab,kw OR (('copy number*' NEAR/3 (variation* OR variant* OR change*)):ti,ab,kw) OR abberati*:ti,ab,kw OR alterati*:ti,ab,kw OR amplificati*:ti,ab,kw OR gain*:ti,ab,kw OR loss*:ti,ab,kw OR deleti*:ti,ab,kw)) | 568,751   |
| #1 | 'colon tumor'/de OR 'colon cancer'/exp OR 'colorectal tumor'/exp OR 'large intestine tumor'/de OR 'appendix tumor'/exp OR 'cecum tumor'/exp OR 'large intestine cancer'/exp OR 'rectum tumor'/exp OR ((carcinoma*:ab,ti OR neoplas*:ab,ti OR tumour*:ab,ti OR adenocar*:ab,ti OR adenoid*:ab,ti OR tumor*:ab,ti OR cancer*:ab,ti OR malignan*:ab,ti) AND ('large intestine'/de OR 'cecum'/exp OR 'colon'/exp OR 'rectum'/exp OR colorectal*:ab,ti OR colon*:ab,ti OR rectal*:ab,ti OR appendi*:ab,ti OR cecum*:ab,ti OR coecum*:ab,ti OR caecum*:ab,ti OR cecal*:ab,ti OR coecal*:ab,ti OR caecal*:ab,ti OR sigmoid*:ab,ti))                                                                                                                                                                                                                      | 486,547   |

### Search strategy for Clarivate Analytics/Web of Science Core Collection (3 December 2018)

Indexes=SCI-EXPANDED, SSCI, A&HCI, ESCI Timespan=All years

TOPIC = words in title, abstract or author keywords

NEAR/x = words near to each other, x places apart

| Search | Query                                                                                                                                                                                                                                       | Items found |
|--------|---------------------------------------------------------------------------------------------------------------------------------------------------------------------------------------------------------------------------------------------|-------------|
| #5     | #4 AND #3 AND #2 AND #1                                                                                                                                                                                                                     | 3,063       |
| #4     | TOPIC: (plasma* OR hematolog* OR haematolog* OR blood OR serum* OR seral*)                                                                                                                                                                  | 3,582,437   |
| #3     | TOPIC: (methylati* OR mutation* OR ("copy number*" AND (variation* OR variant* OR change*)) OR abberati* OR alterati* OR amplificati* OR gain* OR loss* OR deleti*)                                                                         | 3,332,539   |
| #2     | TOPIC: (dna OR dnas OR kras OR braf OR sept9 OR "sept 9" OR cdkn2a OR p16 OR hltf OR alx4 OR alex4 OR bcat1 OR ikzf1 OR vim OR pik3ca OR tp53 OR "tp 53" OR apc OR cfdna* OR ccdna* OR ctdna* OR ftdna* OR fcdna* OR cpdna*)                | 1,381,156   |
| #1     | TOPIC: (((carcinoma* OR neoplas* OR tumour* OR adenocar* OR adenoid* OR tumor* OR cancer* OR malignan*) NEAR/3 (colorectal* OR colon* OR rectal* OR appendi* OR cecum* OR coecum* OR caecum* OR cecal* OR coecal* OR caecal* OR sigmoid*))) | 289,433     |

**Supplementary Figure 1a**

Risk of bias assessment according to the QUADAS-2 for all 134 initially included studies.

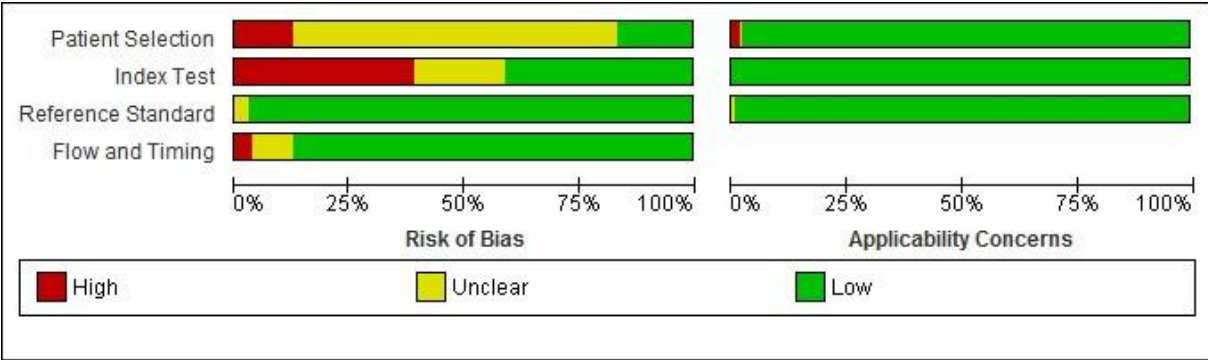

## Supplementary Figure 1b

A detailed overview of the risk of bias assessment according to the QUADAS-2 for each study.

|                                            | Risk of Bias      |            |                    |                 | Applicability Concerns |            |                    |                                               | Risk of Bias      |            |                    |                 | Applicability Concerns |            |                    |
|--------------------------------------------|-------------------|------------|--------------------|-----------------|------------------------|------------|--------------------|-----------------------------------------------|-------------------|------------|--------------------|-----------------|------------------------|------------|--------------------|
|                                            | Patient Selection | Index Test | Reference Standard | Flow and Timing | Patient Selection      | Index Test | Reference Standard |                                               | Patient Selection | Index Test | Reference Standard | Flow and Timing | Patient Selection      | Index Test | Reference Standard |
| Ahliquist Clin Gastroenterol Hepatol. 2012 | High              | Low        | Low                | Low             | Low                    | Low        | Low                | Ito Jpn J Cancer Res. 2002                    | Unclear           | High       | Low                | Low             | Low                    | Low        | Low                |
| Alizadeh Asian Pac J Cancer Prev. 2018     | Unclear           | High       | Low                | Low             | Low                    | Low        | Low                | Ito Oncol Rep. 2003                           | Low               | Unclear    | Low                | Low             | Low                    | Low        | Low                |
| Anker Gastroenterology. 1997               | High              | High       | Unclear            | Unclear         | Low                    | Low        | Unclear            | Jin J Gastroenterol Hepatol. 2015             | Low               | Low        | Low                | Low             | Low                    | Low        | Low                |
| Bartak Epigenetics. 2017                   | High              | High       | Low                | High            | Low                    | Low        | Low                | Johnson PLoS One. 2014                        | Low               | Unclear    | Low                | Unclear         | Low                    | Low        | Low                |
| Baumgartner Ann Surg Oncol. 2018           | Low               | High       | Low                | High            | High                   | Low        | Low                | Kawasaki Personalized Medicine Universe. 2013 | Unclear           | High       | Low                | Low             | Low                    | Low        | Low                |
| Bazan Ann Oncol. 2018                      | High              | High       | Low                | Low             | Unclear                | Low        | Low                | Kidess Oncotarget. 2015                       | Unclear           | Low        | Low                | Low             | Low                    | Low        | Low                |
| Bedin Int J Cancer. 2017                   | Unclear           | High       | Low                | Low             | Low                    | Low        | Low                | Kim Clin Lab. 2018                            | Low               | High       | Low                | Low             | Low                    | Low        | Low                |
| Beranek Acta Medica (Hradec Kralove). 2016 | Unclear           | Low        | Low                | Unclear         | Low                    | Low        | Low                | Kim Oncol Rep. 2011                           | Unclear           | Low        | Low                | Low             | Low                    | Low        | Low                |
| Bergheim Br J Cancer. 2018                 | Low               | High       | Low                | Low             | Low                    | Low        | Low                | Kim Oncotarget. 2015                          | Unclear           | Low        | Low                | Low             | Low                    | Low        | Low                |
| Bettegowda Sci Transl Med. 2014            | Unclear           | High       | Low                | Low             | Low                    | Low        | Low                | Kloten Oncotarget. 2017                       | Unclear           | Low        | Low                | Low             | Low                    | Low        | Low                |
| Boeckx Clin Colorectal Cancer. 2018        | Unclear           | High       | Low                | Low             | Low                    | Low        | Low                | Kondratov Biopolym. Cell. 2014                | Unclear           | Low        | Low                | Low             | Low                    | Low        | Low                |
| Chen J Clin Lab Anal. 2017                 | Low               | Low        | Low                | Low             | Low                    | Low        | Low                | Kottorou Oncotarget. 2018                     | Unclear           | Low        | Low                | High            | Low                    | Low        | Low                |
| Church Gut. 2014                           | High              | Low        | Low                | Low             | Low                    | Low        | Low                | Kuo Clin Chim Acta. 2014                      | Unclear           | Low        | Low                | Low             | Low                    | Low        | Low                |
| Danese Br J Cancer. 2013                   | Low               | Low        | Low                | Low             | Low                    | Low        | Low                | Lee Clin Cancer Res. 2009                     | Unclear           | Low        | Low                | Low             | Low                    | Low        | Low                |
| Danese PLoS One. 2015                      | Low               | Low        | Low                | Low             | Low                    | Low        | Low                | Leung Am J Gastroenterol. 2005                | Unclear           | High       | Low                | Low             | Low                    | Low        | Low                |
| de Kok Scand J Clin Lab Invest. 1997       | Unclear           | High       | Low                | Low             | Low                    | Low        | Low                | Lilleberg Ann N Y Acad Sci. 2004              | Unclear           | Low        | Low                | Low             | Low                    | Low        | Low                |
| deVos Clin Chem. 2009                      | Unclear           | High       | Low                | Unclear         | Low                    | Low        | Low                | Li Mol Oncol. 2017                            | Low               | Low        | Low                | Low             | Low                    | Low        | Low                |
| Diehl Gastroenterology. 2008               | Unclear           | High       | Low                | Low             | Low                    | Low        | Low                | Lin Ann Surg Oncol. 2014                      | Unclear           | Unclear    | Low                | Low             | Low                    | Low        | Low                |
| Diehl Proc Natl Acad Sci U S A. 2005       | Low               | High       | Low                | Low             | Low                    | Low        | Low                | Lin Ann Surg Oncol. 2015                      | High              | Low        | Low                | Unclear         | Low                    | Low        | Low                |
| Ebert Gastroenterology. 2006               | High              | Low        | Low                | Low             | Low                    | Low        | Low                | Li Nat Biotechnol. 2009                       | Unclear           | Low        | Low                | Low             | Low                    | Low        | Low                |
| Erdem Turk J Gastroenterol. 2014           | Unclear           | Unclear    | Low                | Low             | Low                    | Low        | Low                | Lindfors Anticancer Res. 2005                 | Unclear           | High       | Low                | Low             | Low                    | Low        | Low                |
| Fratini Cancer Lett. 2008                  | Unclear           | Unclear    | Low                | Low             | Low                    | Low        | Low                | Li Theranostics. 2018                         | Unclear           | Low        | Low                | Low             | Low                    | Low        | Low                |
| Fu Dis Markers. 2018                       | Unclear           | Low        | Low                | Low             | Low                    | Low        | Low                | Liu Biomarkers. 2013                          | Unclear           | High       | Low                | Low             | Low                    | Low        | Low                |
| Furuki Eur J Surg Oncol. 2018              | Unclear           | High       | Low                | Low             | Low                    | Low        | Low                | Liu Clin Chim Acta. 2010                      | Unclear           | Unclear    | Low                | Low             | Low                    | Low        | Low                |
| Grady Cancer Res. 2001                     | Unclear           | Unclear    | Low                | Low             | Low                    | Low        | Low                | Liu Exp Ther Med. 2012                        | Unclear           | Unclear    | Low                | Low             | Low                    | Low        | Low                |
| Grutzmann PLoS One. 2008                   | Unclear           | High       | Low                | High            | Low                    | Low        | Low                | Lofton-Day Clin Chem. 2008                    | Unclear           | Low        | Low                | Low             | Low                    | Low        | Low                |
| He Cancer Genet Cytogenet. 2010            | Unclear           | Low        | Low                | Low             | Low                    | Low        | Low                | Loree J Natl Cancer Inst. 2018                | Unclear           | High       | Low                | Low             | Low                    | Low        | Low                |
| Herbst Am J Gastroenterol. 2011            | Unclear           | High       | Low                | Low             | Low                    | Low        | Low                | Matthaios Oncol Lett. 2016                    | Unclear           | Unclear    | Low                | Low             | Low                    | Low        | Low                |
| Herbst Eur J Gastroenterol Hepatol. 2009   | Unclear           | Low        | Low                | Low             | Low                    | Low        | Low                | Melson Int J Cancer. 2014                     | Unclear           | High       | Low                | Low             | Low                    | Low        | Low                |
| Herbst Int J Cancer. 2017                  | Unclear           | Low        | Low                | Low             | Low                    | Low        | Low                | Miotto Cancer Res. 2004                       | Unclear           | Unclear    | Low                | Low             | Low                    | Low        | Low                |
| Hibi Anticancer Res. 2012                  | Unclear           | Low        | Low                | Low             | Low                    | Low        | Low                | Mitchell Genes (Basel). 2016                  | Unclear           | Low        | Low                | Low             | Low                    | Low        | Low                |
| Hibi Cancer Lett. 2011                     | Unclear           | Low        | Low                | Low             | Low                    | Low        | Low                | Miyano Exp Ther Med. 2012                     | Unclear           | High       | Low                | Low             | Low                    | Low        | Low                |
| Hibi Cancer Res. 1998                      | Unclear           | High       | Low                | High            | Low                    | Low        | Low                | Molparia PLoS One. 2018                       | Unclear           | Low        | Low                | Low             | Low                    | Low        | Low                |
| Hsieh Am Surg. 2005                        | Unclear           | Unclear    | Low                | Low             | Low                    | Low        | Low                | Nagai Oncotarget. 2017                        | Low               | High       | Low                | Low             | Low                    | Low        | Low                |

● High      ? Unclear      ● Low

● High      ? Unclear      ● Low



### Supplementary Figure 1b (continued)

|                                 | Risk of Bias      |            |                    |                 | Applicability Concerns |            |                    |  | Risk of Bias                            |            |                    |                 | Applicability Concerns |            |                    |   |   |
|---------------------------------|-------------------|------------|--------------------|-----------------|------------------------|------------|--------------------|--|-----------------------------------------|------------|--------------------|-----------------|------------------------|------------|--------------------|---|---|
|                                 | Patient Selection | Index Test | Reference Standard | Flow and Timing | Patient Selection      | Index Test | Reference Standard |  | Patient Selection                       | Index Test | Reference Standard | Flow and Timing | Patient Selection      | Index Test | Reference Standard |   |   |
| Nakayama Anticancer Res. 2007   | ?                 | ●          | ●                  | ●               | ●                      | ●          | ●                  |  | Song Biomark Med 2018                   | ?          | ●                  | ●               | ●                      | ●          | ●                  | ● | ● |
| Nakayama Anticancer Res. 2011   | ?                 | ●          | ●                  | ●               | ●                      | ●          | ●                  |  | Song Epigenomics. 2017                  | ●          | ●                  | ●               | ●                      | ●          | ●                  | ● | ● |
| Nakayama Cancer Lett. 2002      | ?                 | ●          | ●                  | ●               | ●                      | ●          | ●                  |  | Song J Cancer Res Clin Oncol. 2017      | ●          | ●                  | ●               | ●                      | ●          | ●                  | ● | ● |
| Nishio Anticancer Res. 2010     | ?                 | ●          | ●                  | ●               | ●                      | ●          | ●                  |  | Sun Oncol Lett. 2018                    | ●          | ●                  | ●               | ●                      | ●          | ●                  | ● | ● |
| Nunes Cancers (Basel). 2018     | ●                 | ●          | ●                  | ●               | ●                      | ●          | ●                  |  | Symonds Clin Epigenetics. 2018          | ?          | ●                  | ●               | ●                      | ●          | ●                  | ● | ● |
| Oh J Mol Diagn. 2013            | ?                 | ●          | ●                  | ●               | ●                      | ●          | ●                  |  | Symonds Clin Transl Gastroenterol. 2016 | ●          | ●                  | ●               | ●                      | ●          | ●                  | ● | ● |
| Olmedillas Int J Mol Sci. 2016  | ●                 | ?          | ●                  | ●               | ●                      | ●          | ●                  |  | Taback Ann N Y Acad Sci. 2006           | ?          | ●                  | ●               | ●                      | ●          | ●                  | ● | ● |
| Ono Mol Oncol. 2017             | ?                 | ●          | ●                  | ●               | ●                      | ●          | ●                  |  | Tanzer PLoS One. 2010                   | ?          | ●                  | ●               | ●                      | ●          | ●                  | ● | ● |
| Orntoft BMC Cancer. 2015        | ●                 | ●          | ●                  | ●               | ●                      | ●          | ●                  |  | Thomsen Cancer Med. 2017                | ●          | ●                  | ●               | ●                      | ●          | ●                  | ● | ● |
| Pack Int J Colorectal Dis. 2013 | ●                 | ●          | ●                  | ●               | ●                      | ●          | ●                  |  | Tian Int J Biol Markers. 2017           | ●          | ●                  | ●               | ●                      | ●          | ●                  | ● | ● |
| Pedersen BMC Cancer. 2015       | ●                 | ●          | ●                  | ●               | ●                      | ●          | ●                  |  | Toledo Oncotarget 2017                  | ?          | ●                  | ●               | ●                      | ●          | ●                  | ● | ● |
| Perrone Tumori. 2014            | ?                 | ?          | ●                  | ●               | ●                      | ●          | ●                  |  | Toth PLoS One. 2012                     | ?          | ●                  | ●               | ●                      | ●          | ●                  | ● | ● |
| Phallen Sci Transl Med. 2017    | ●                 | ●          | ●                  | ●               | ●                      | ●          | ●                  |  | Toth PLoS One. 2014                     | ?          | ●                  | ●               | ●                      | ●          | ●                  | ● | ● |
| Philipp BMC Cancer. 2014        | ?                 | ●          | ●                  | ●               | ●                      | ●          | ●                  |  | Wallner Clin Cancer Res. 2006           | ?          | ●                  | ●               | ?                      | ●          | ●                  | ● | ● |
| Philipp Int J Cancer. 2012      | ?                 | ●          | ●                  | ●               | ●                      | ●          | ●                  |  | Wang World J Surg. 2004                 | ?          | ?                  | ●               | ●                      | ●          | ●                  | ● | ● |
| Potter Clin Chem. 2014          | ?                 | ●          | ●                  | ●               | ●                      | ●          | ●                  |  | Warren BMC Med. 2011                    | ?          | ●                  | ●               | ●                      | ●          | ●                  | ● | ● |
| Pu Oncol Lett. 2013             | ?                 | ?          | ●                  | ●               | ●                      | ●          | ●                  |  | Wu Chin J Cancer Res. 2011              | ?          | ?                  | ●               | ●                      | ●          | ●                  | ● | ● |
| Rachiglio Oncotarget. 2016      | ?                 | ●          | ●                  | ●               | ●                      | ●          | ●                  |  | Wu J Mol Diagn. 2016                    | ●          | ●                  | ●               | ?                      | ●          | ●                  | ● | ● |
| Rasmussen PLoS One. 2017        | ?                 | ●          | ●                  | ●               | ●                      | ●          | ●                  |  | Xiao Oncol Lett. 2015                   | ?          | ?                  | ●               | ?                      | ●          | ●                  | ● | ● |
| Rezvani Oncol Lett. 2017        | ?                 | ●          | ●                  | ●               | ●                      | ●          | ●                  |  | Xie Front Oncol. 2018                   | ?          | ●                  | ●               | ●                      | ●          | ●                  | ● | ● |
| Riviere Mol Cancer Ther. 2018   | ●                 | ●          | ●                  | ?               | ●                      | ●          | ●                  |  | Xue Oncotarget. 2017                    | ?          | ?                  | ?               | ?                      | ●          | ●                  | ● | ● |
| Roperch BMC Cancer. 2013        | ?                 | ●          | ●                  | ●               | ●                      | ●          | ●                  |  | Xu J Dig Dist 2018                      | ●          | ●                  | ●               | ●                      | ●          | ●                  | ● | ● |
| Ryan Gut. 2003                  | ?                 | ●          | ●                  | ●               | ●                      | ●          | ●                  |  | Yamada Cancer Sci. 2016                 | ?          | ●                  | ●               | ●                      | ●          | ●                  | ● | ● |
| Sabbioni Mol Diagn. 2003        | ?                 | ?          | ?                  | ?               | ●                      | ●          | ●                  |  | Yamashita PLoS One. 2014                | ?          | ●                  | ●               | ●                      | ●          | ●                  | ● | ● |
| Sakai PLoS One. 2015            | ?                 | ?          | ●                  | ●               | ●                      | ●          | ●                  |  | Yamauchi Int J Cancer. 2018             | ●          | ●                  | ●               | ●                      | ●          | ●                  | ● | ● |
| Sakamoto Cancer Epidemiol. 2010 | ?                 | ?          | ●                  | ●               | ●                      | ●          | ●                  |  | Yang Biosci Rep. 2018                   | ?          | ●                  | ●               | ●                      | ●          | ●                  | ● | ● |
| Salehi Adv Biomed Res. 2015     | ?                 | ?          | ●                  | ●               | ●                      | ●          | ●                  |  | Yan World J Gastroenterol. 2014         | ●          | ?                  | ●               | ●                      | ●          | ●                  | ● | ● |
| Sclafani Sci Rep. 2018          | ●                 | ●          | ●                  | ●               | ●                      | ●          | ●                  |  | Yuan Transl Cancer Res 2016             | ?          | ?                  | ●               | ●                      | ●          | ●                  | ● | ● |
| Sefrioui Clin Biochem. 2017     | ●                 | ●          | ●                  | ●               | ●                      | ●          | ●                  |  | Zeng Mol Diagn Ther. 2017               | ?          | ●                  | ●               | ●                      | ●          | ●                  | ● | ● |
| Shalaby Gene. 2018              | ?                 | ●          | ●                  | ●               | ●                      | ●          | ●                  |  | Zhang World J Gastroenterol. 2015       | ?          | ●                  | ●               | ●                      | ●          | ●                  | ● | ● |
| Shen Lab Med. 2010              | ?                 | ●          | ?                  | ?               | ●                      | ●          | ●                  |  | Zheng Hepatogastroenterology. 2011      | ?          | ?                  | ●               | ●                      | ●          | ●                  | ● | ● |
| Shin PLoS One. 2017             | ●                 | ●          | ●                  | ●               | ●                      | ●          | ●                  |  | Zou Clin Cancer Res. 2002               | ?          | ?                  | ●               | ●                      | ●          | ●                  | ● | ● |
| Shirahata Anticancer Res. 2010  | ?                 | ?          | ●                  | ●               | ●                      | ●          | ●                  |  |                                         |            |                    |                 |                        |            |                    |   |   |
| Shirahata Anticancer Res. 2014  | ?                 | ●          | ●                  | ●               | ●                      | ●          | ●                  |  |                                         |            |                    |                 |                        |            |                    |   |   |

● High      ? Unclear      ● Low
